# Supplementary material
Source: publisher figshare collection journal article supplement (https://geolsoc.figshare.com/articles/dataset/_/3453551)

data-point error ellipses are  $2\sigma$

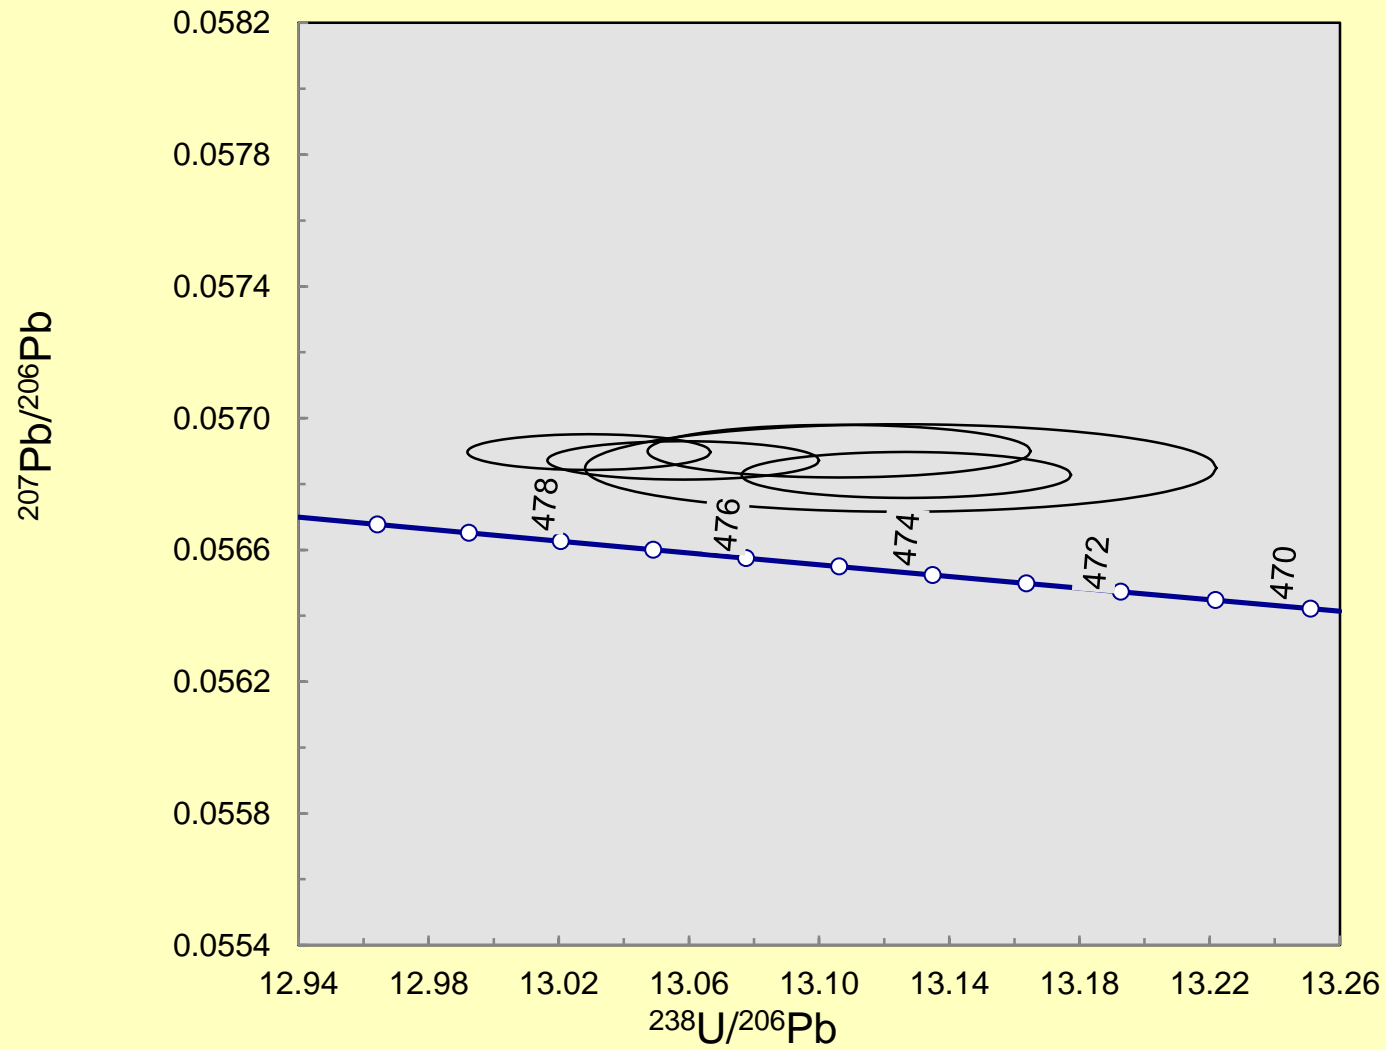

Supplement: Supplementary file 1 [file 1]

data-point error symbols are  $2\sigma$

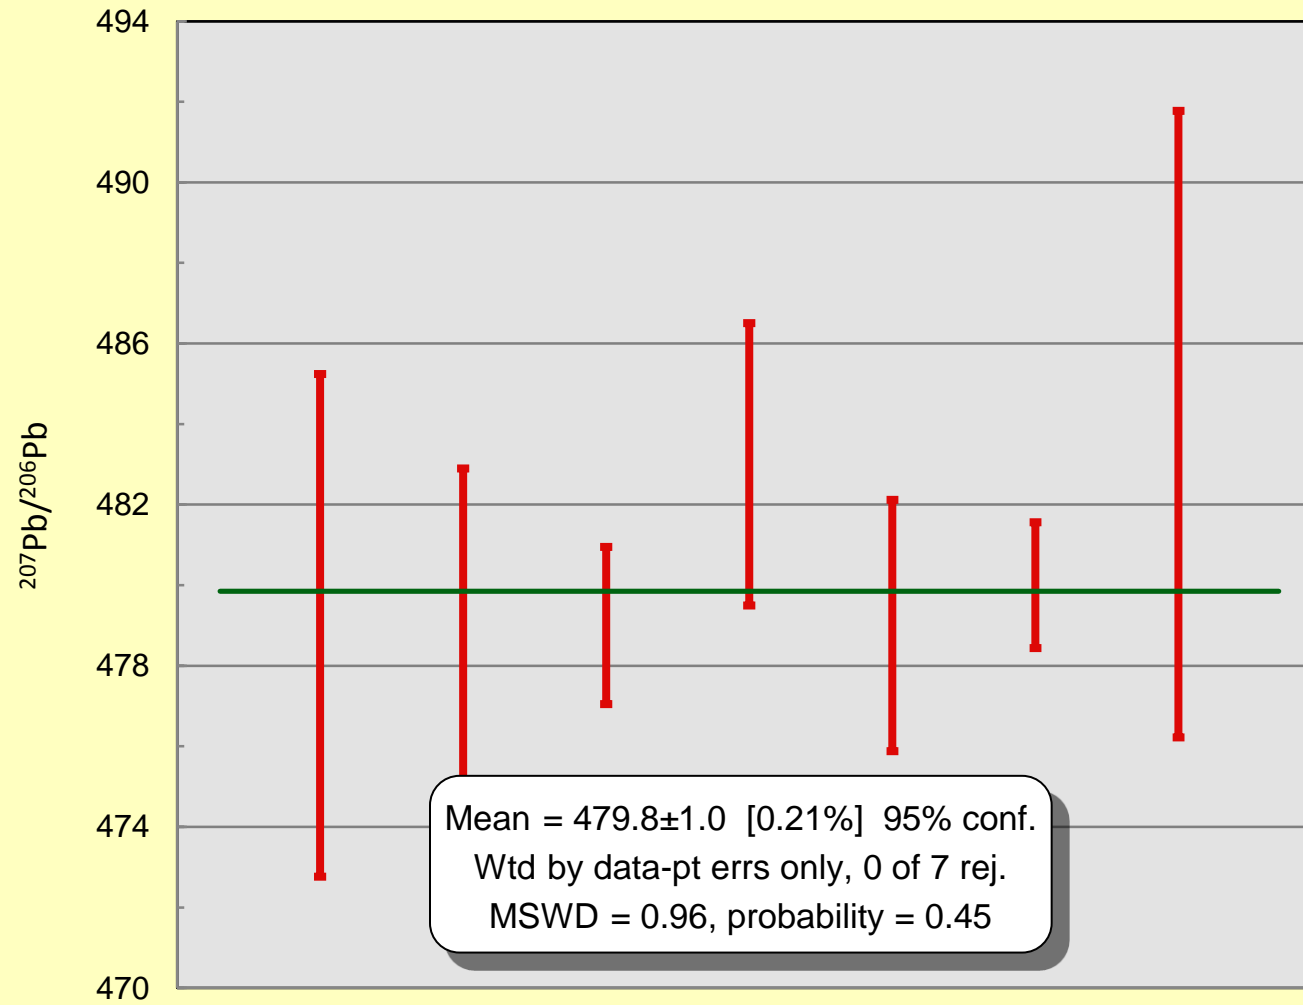

Supplement: Supplementary file 2 [file 1]

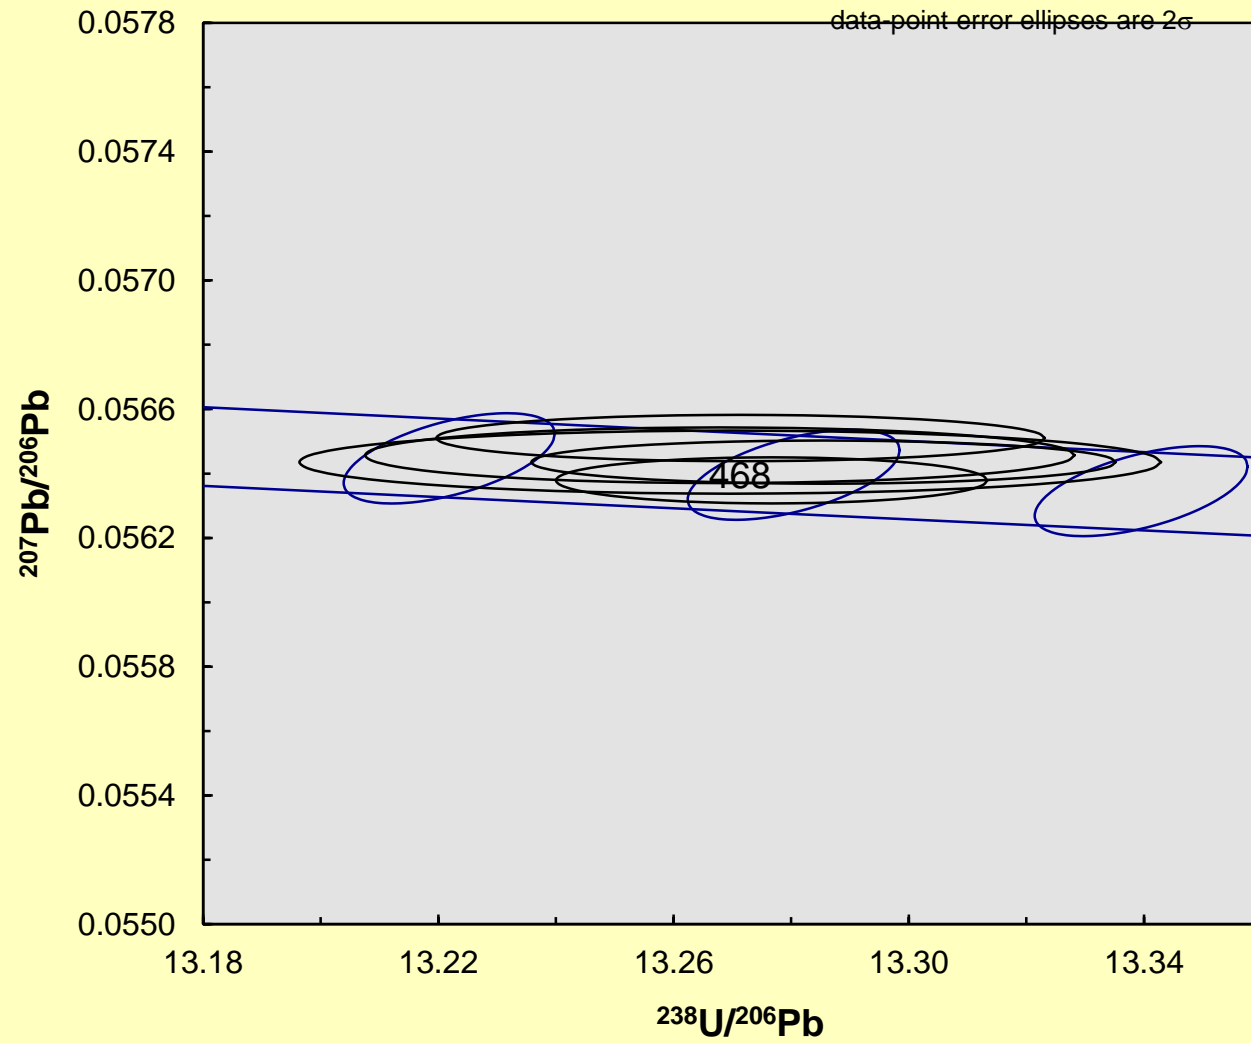

Supplement: Supplementary file 3 [file 1]

data-point error symbols are  $2\sigma$

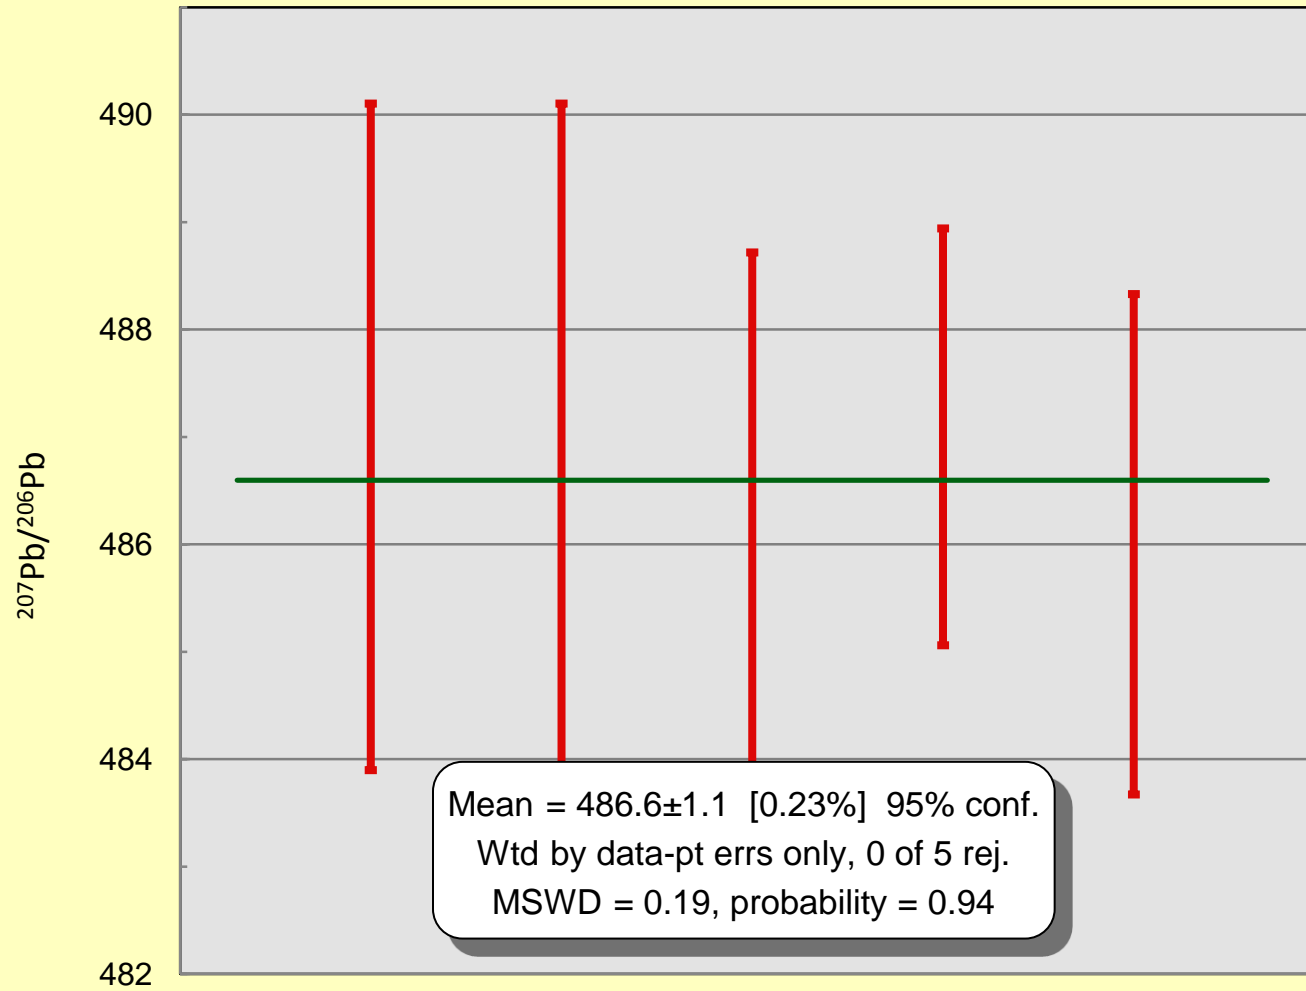

Supplement: Supplementary file 4 [file 1]

data-point error ellipses are  $2\sigma$

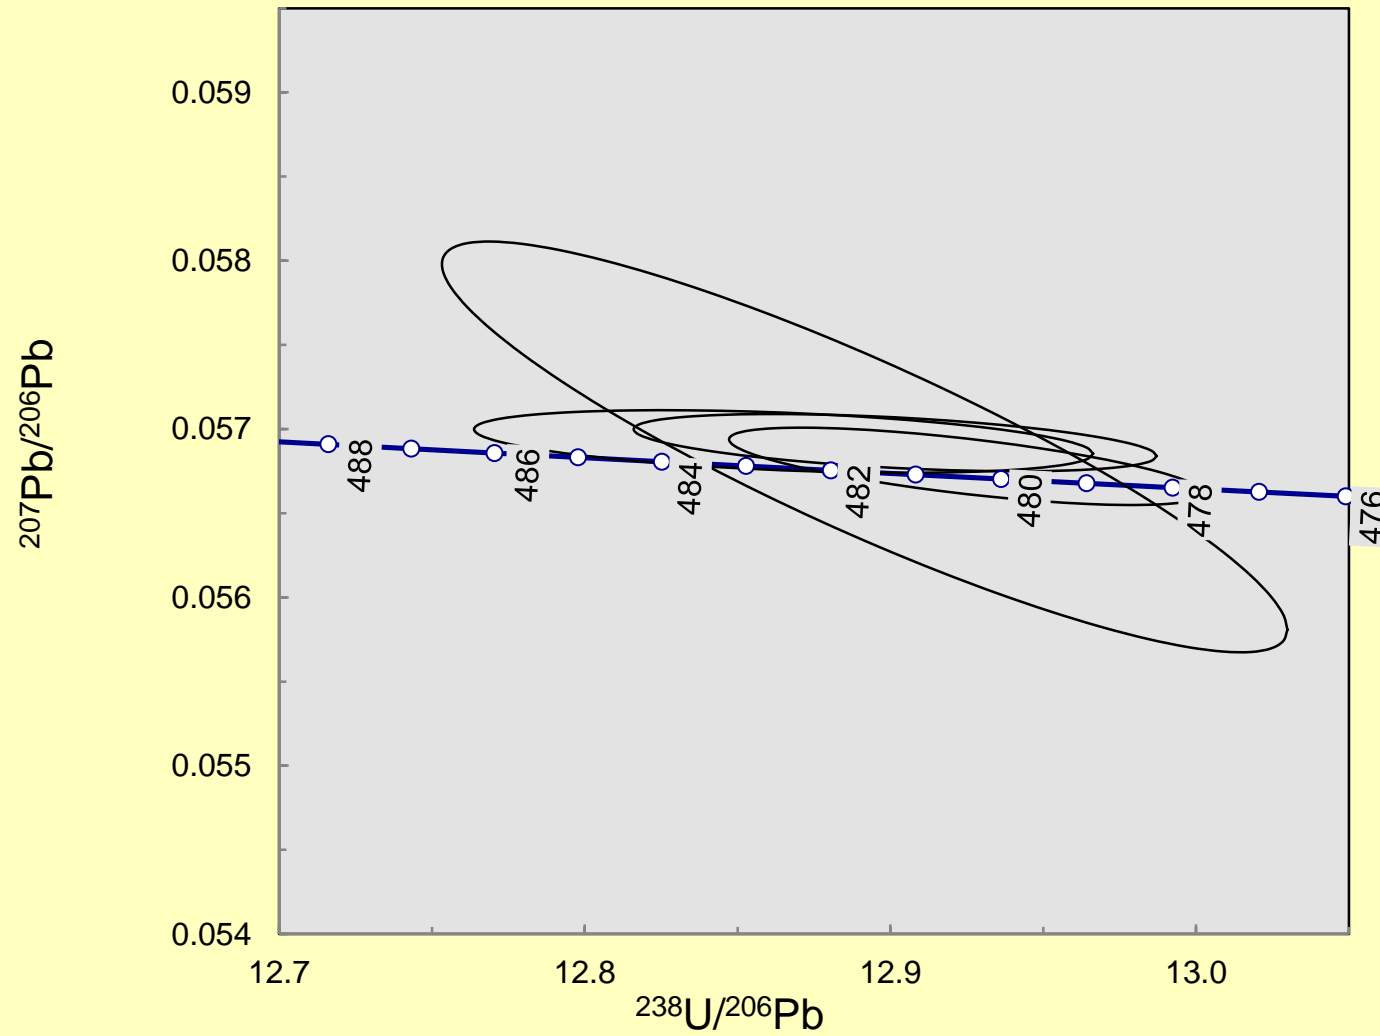

Supplement: Supplementary file 5 [file 1]

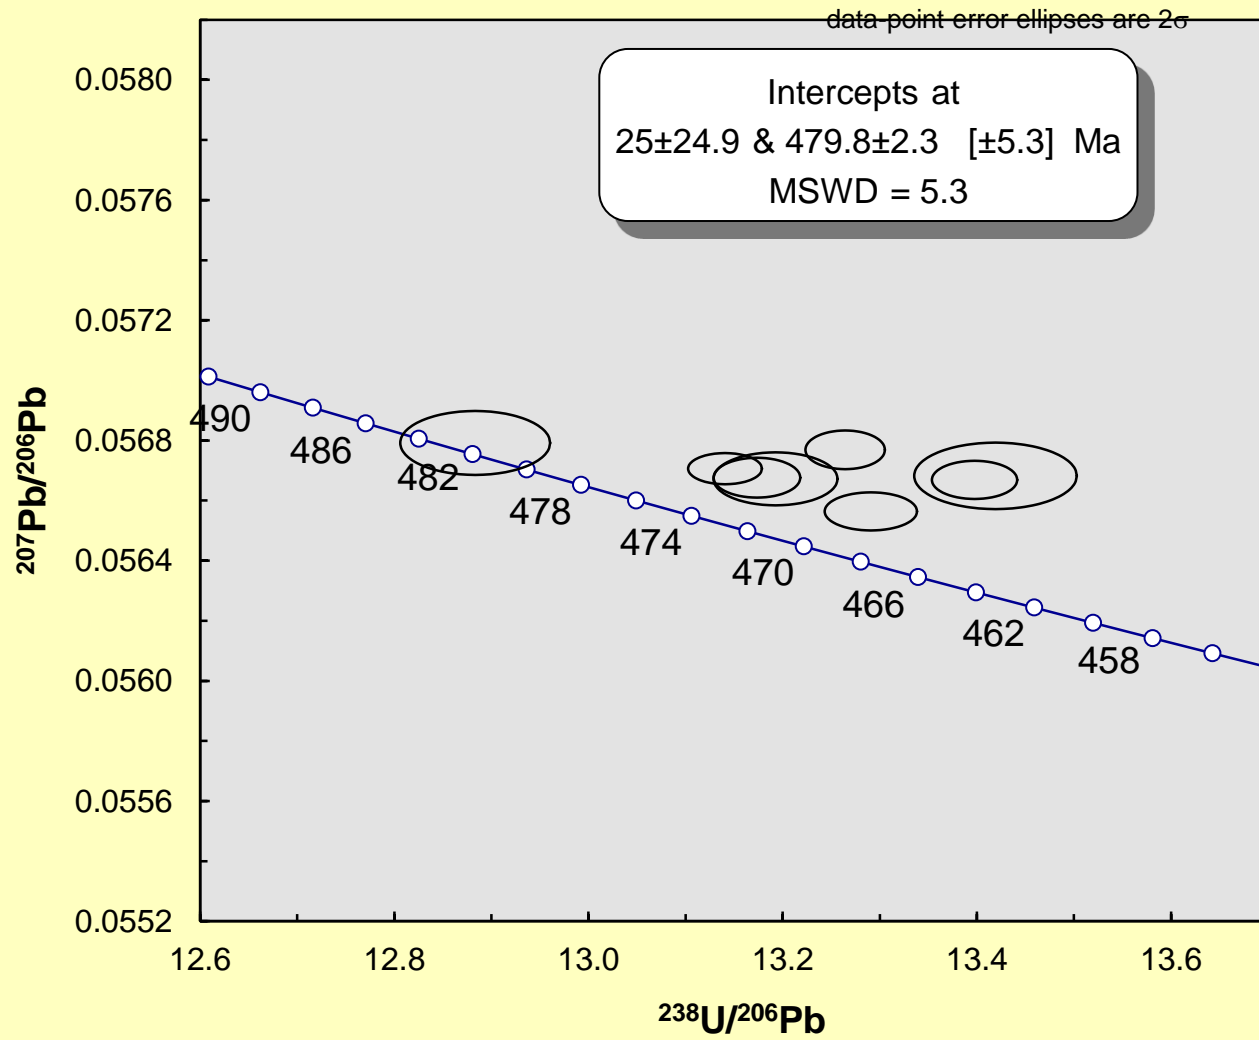

Supplement: Supplementary file 6 [file 1]

data-point error symbols are  $2\sigma$

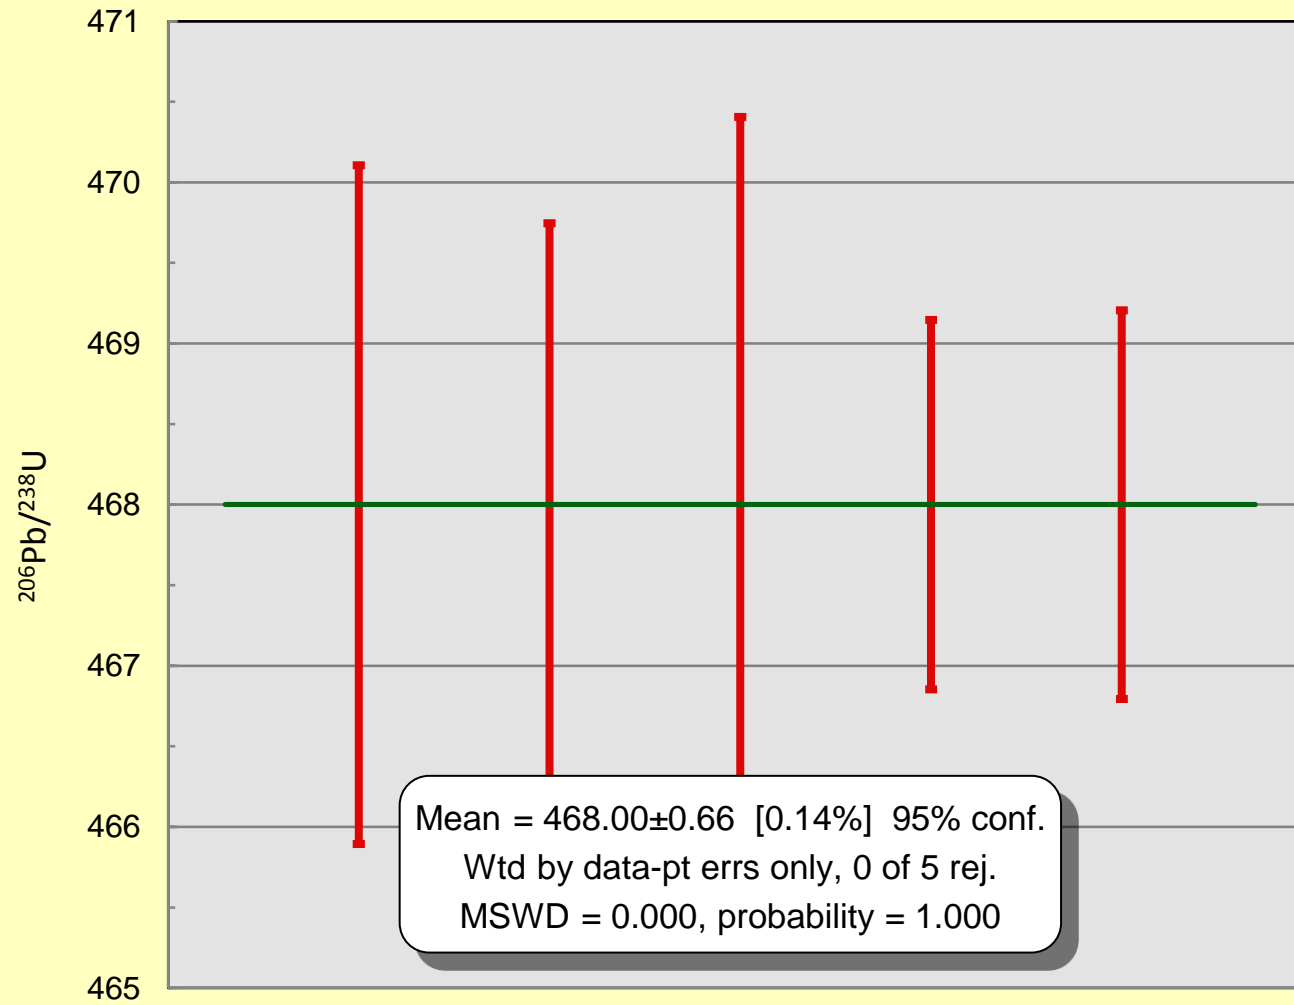

Supplement: Supplementary file 7 [file 1]

data-point error symbols are  $2\sigma$

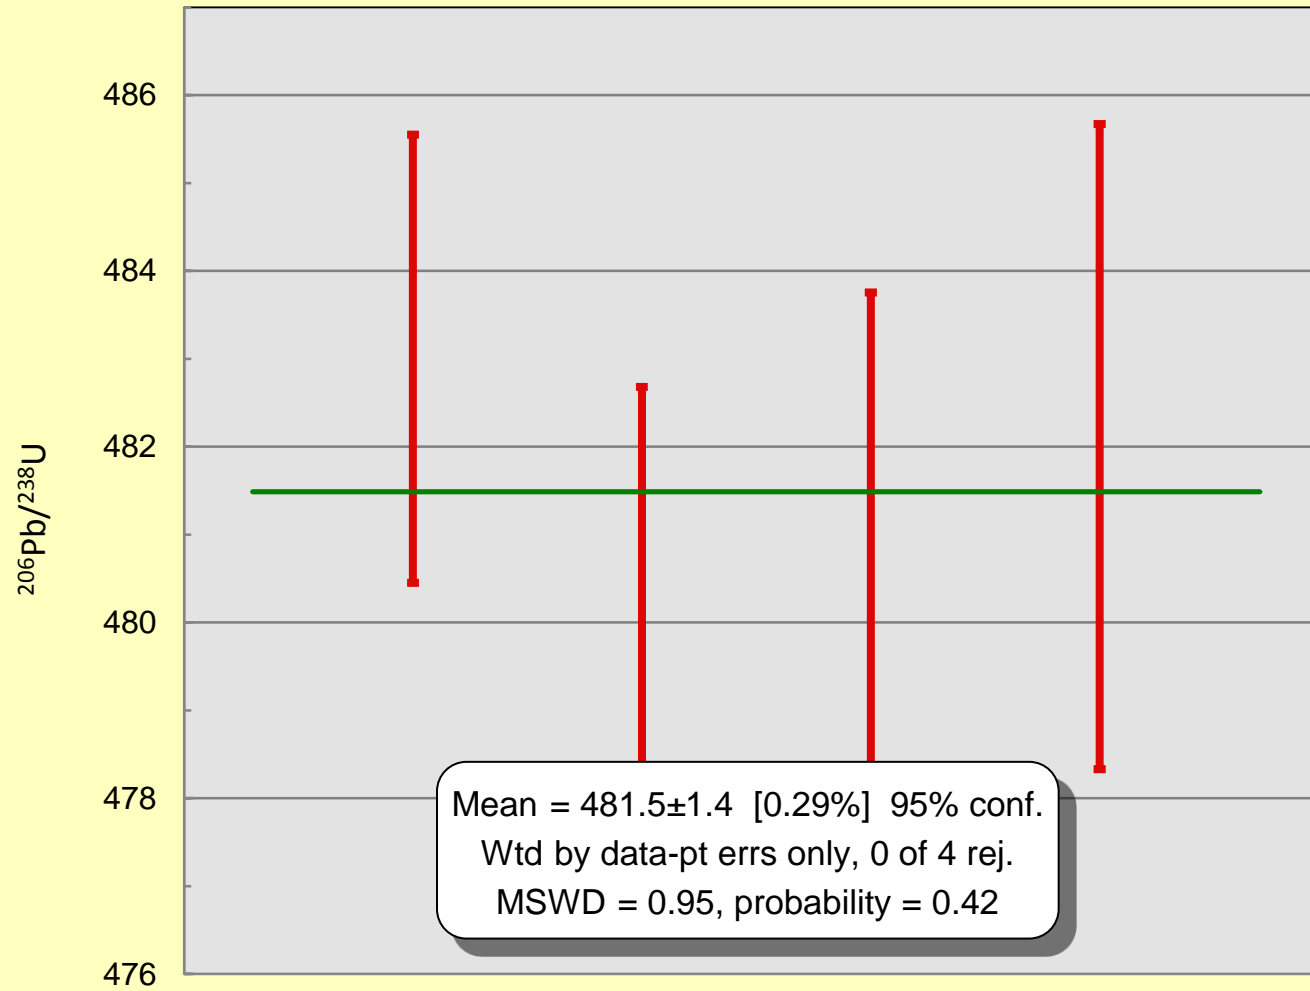

Supplement: Supplementary file 8 [file 1]
